# Supplementary material for: Adult zebrafish Langerhans cells arise from hematopoietic stem/progenitor cells
Source: eLife journal article supplement (doi:10.7554/elife.36131), 2018-06-15

# Figure 2-figure supplement 1.

**A**

Average body length

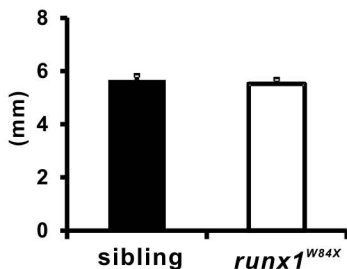

**B**

Average body length

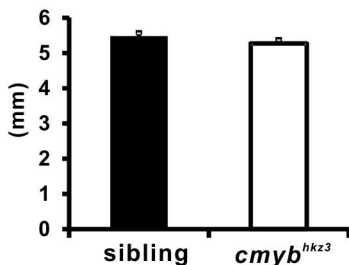

**C**

Density of RBI-derived GFP<sup>+</sup> Langerhans cells

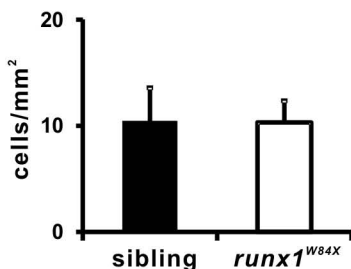

**D**

Density of RBI-derived GFP<sup>+</sup> Langerhans cells

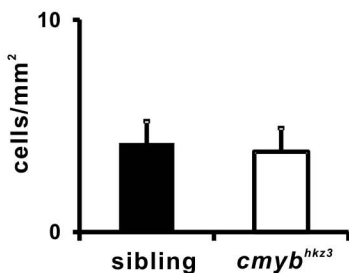

**E**

Density of total Langerhans cells

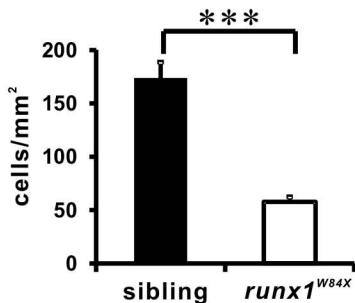

**F**

Density of total Langerhans cells

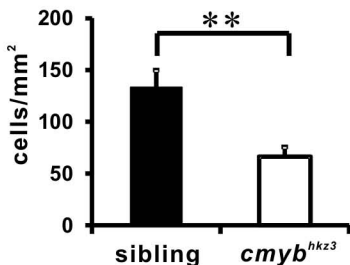

Supplement: supp [file elife-36131-supp-v1.zip]
