# Supplementary figures and images for: Adult zebrafish Langerhans cells arise from hematopoietic stem/progenitor cells
Source: eLife journal article supplement (doi:10.7554/elife.36131), 2018-06-15

# Figure 5-figure supplement 1.

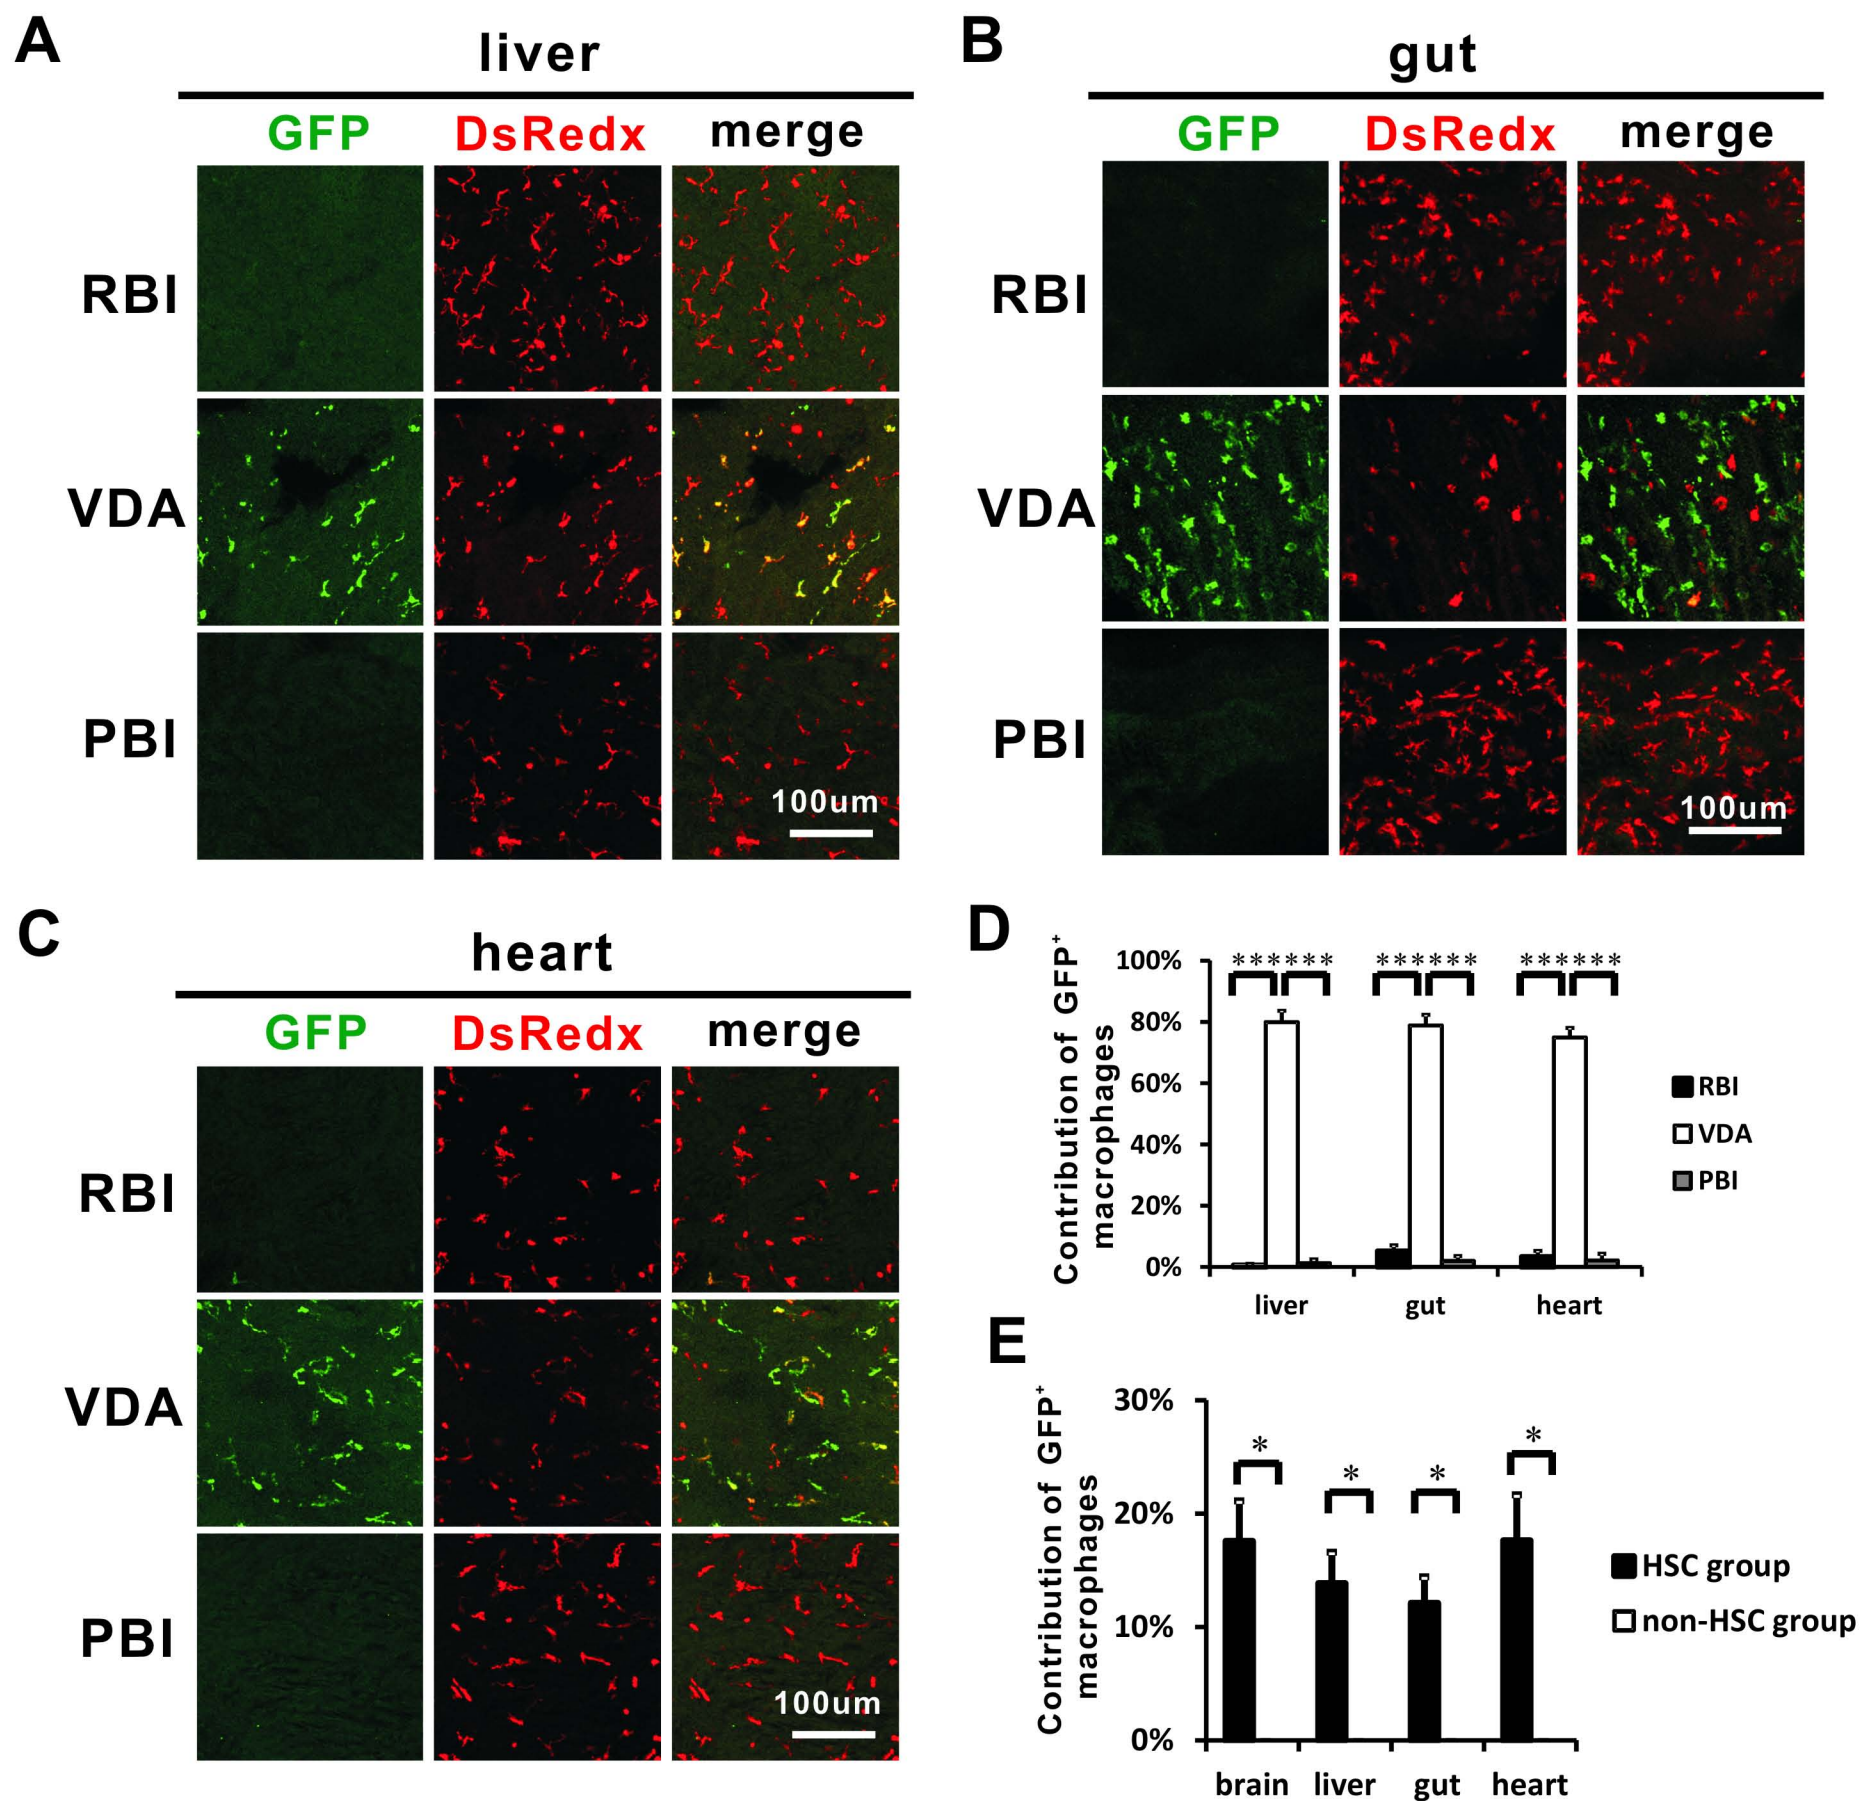

Supplement: supp [file elife-36131-supp-v1.zip]

# Figure 1-figure Supplement 1.

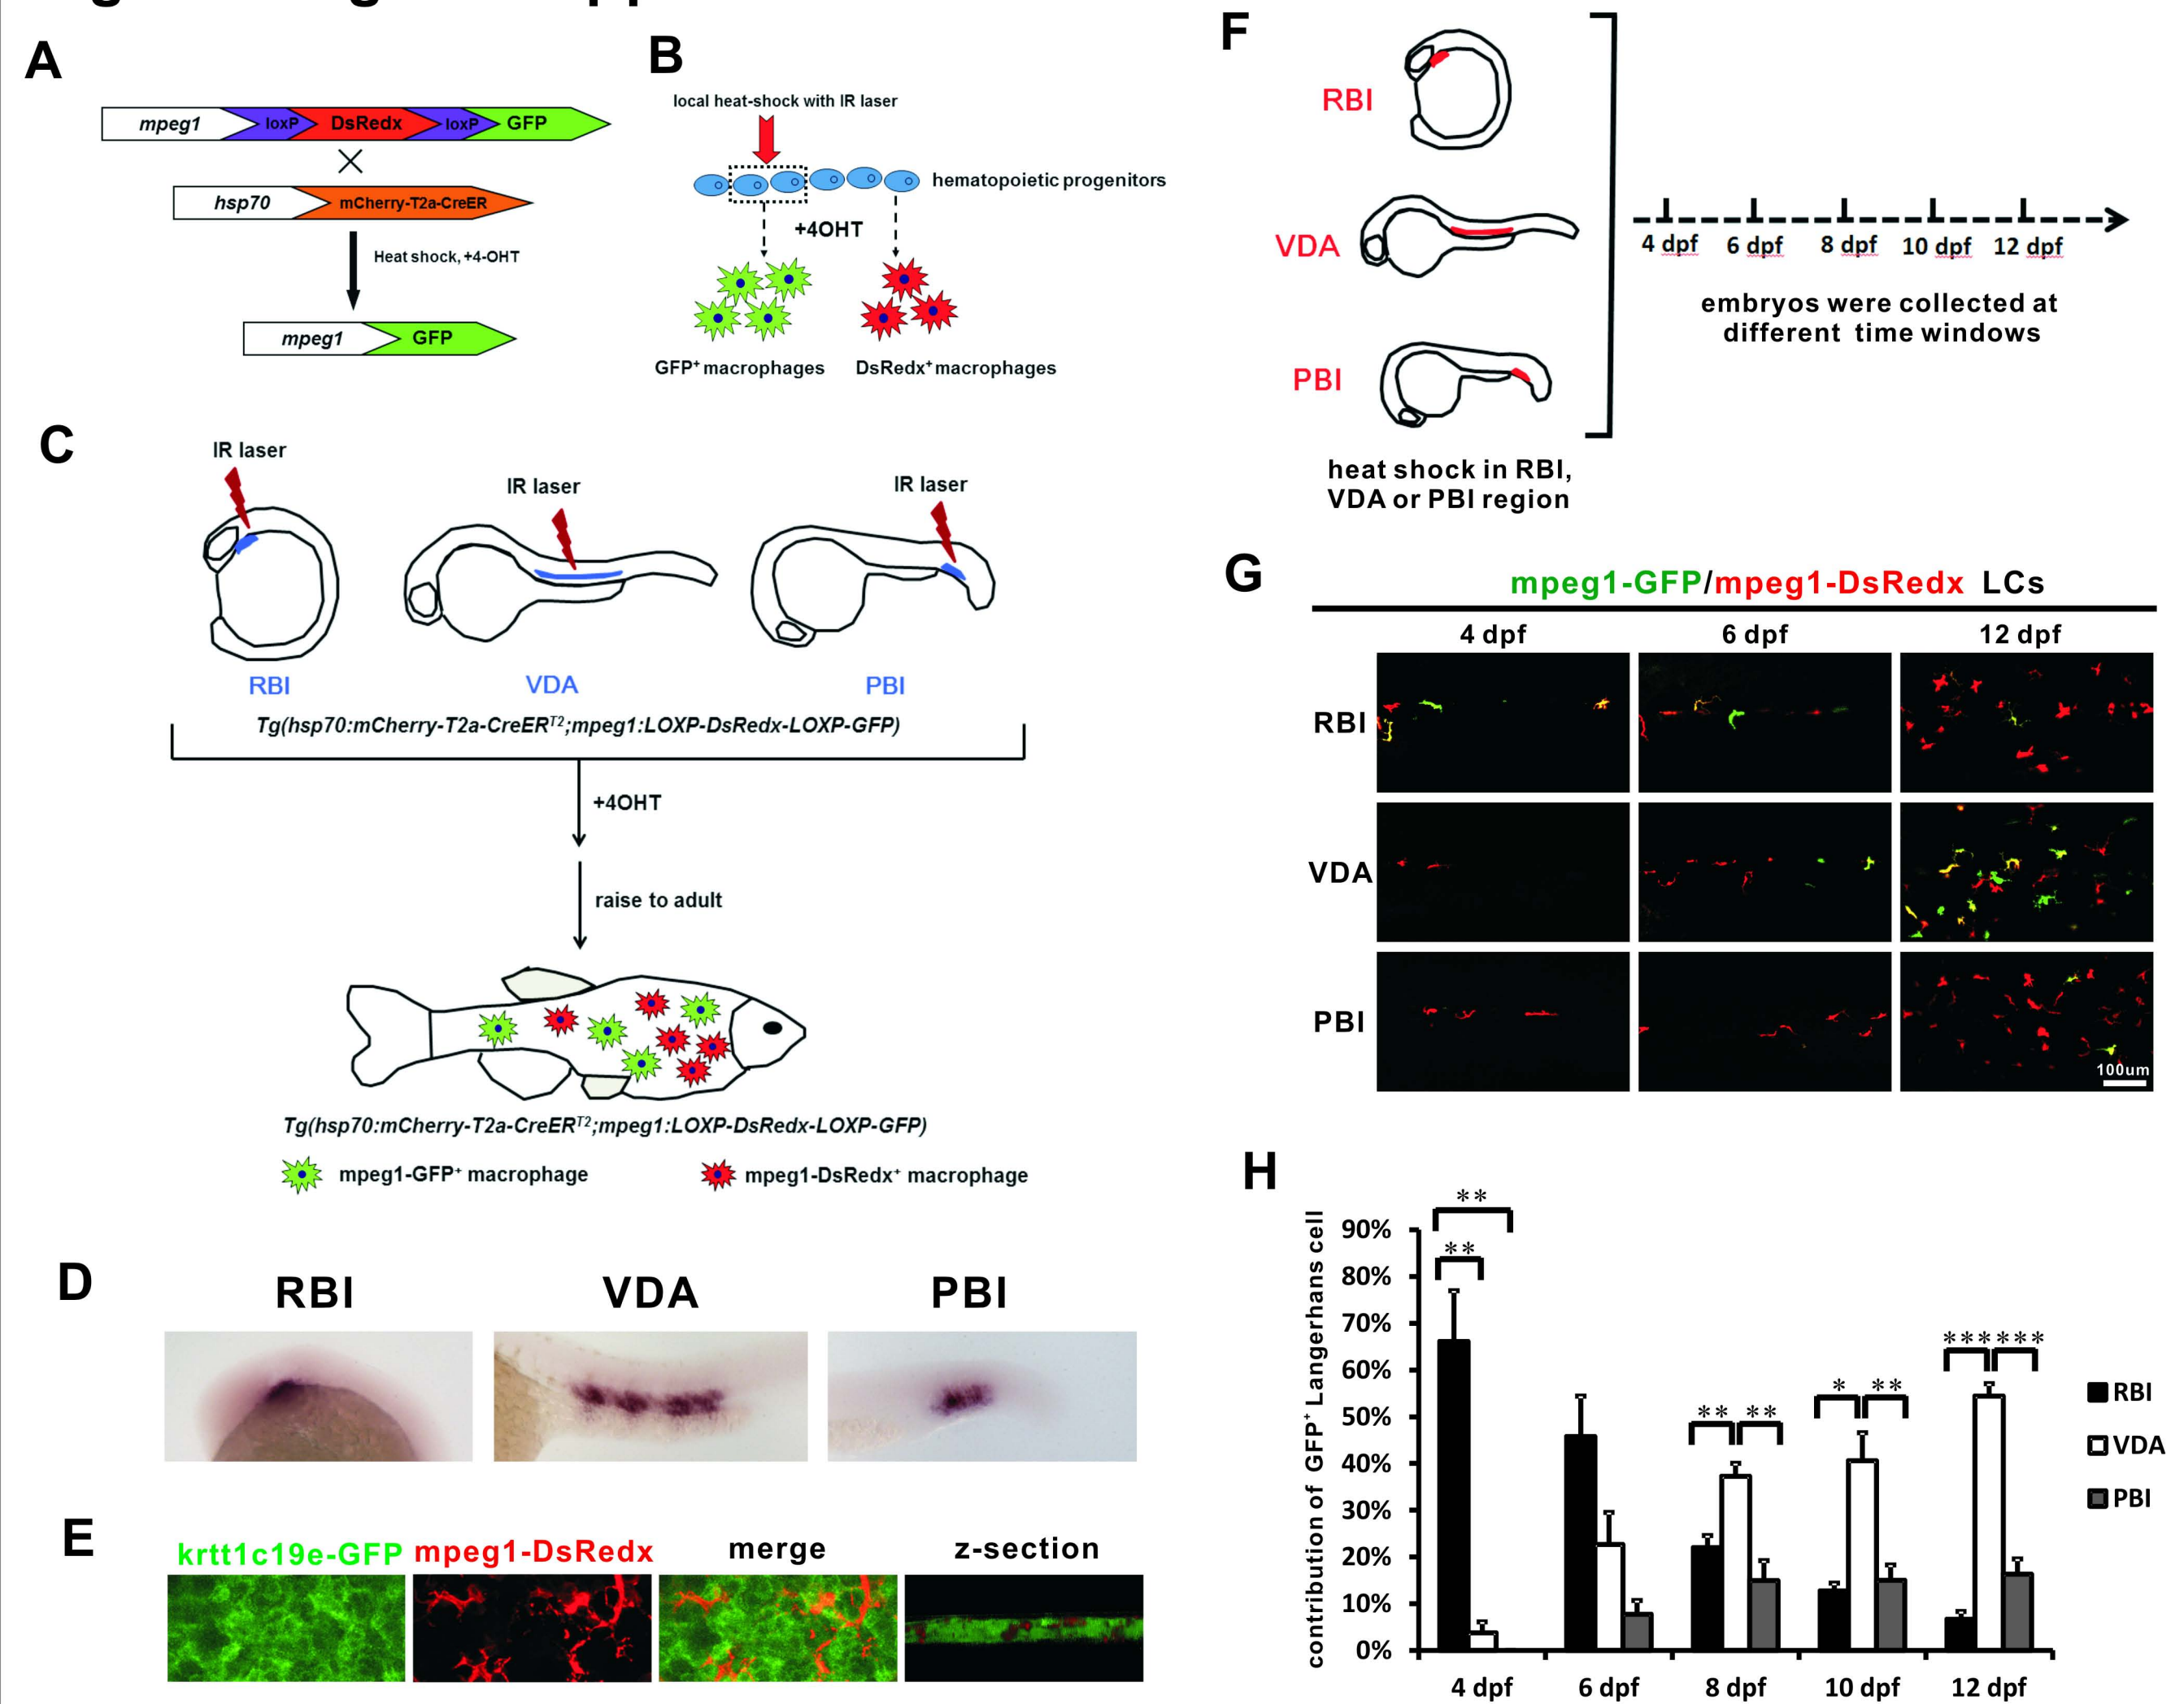

Supplement: supp [file elife-36131-supp-v1.zip]
